# Supplementary material
Source: publisher site journal article supplement (https://www.dovepress.com/article/458278)
Supplement: Supplementary file 1 [file get_supplementary_file.php]

Supplementary materials :

Flow cytometry

NNK Cells were stained with various antibodies purchased from Miltenyi Biotec : CD3-PE-Cy7, CD16-FITC, CD62L-Vioblue, CD27-Viobright FITC, CD57-PE, CD56-PerCpVio700, CD11b-APC, CD16-APCVio770, PD1-Viobright515, CD226/DNAM1-APC, CD56-APC ; and BD : Tim3-BV421, NKp44-PE. Murine blood samples were stained with anti-Ly49-pure (BD) antibody and secondary anti-IgG-AlexaFluor633 (Invitrogen, USA) and anti-NKp44-PE (BD) antibody. Cell viability was assessed by 7-aminoactinomycin D (7-AAD, BD) staining.

MB cell lines were stained using the following antibodies, which were all purchased from BD Bioscience: CD105-PerCp5-5, CD73-PE, B7H3-AlexaFluor488, B7H1(PD-1)-FITC, B7H4-APC, CD155(PVR)-AlexaFluor647, MICA/B-AlexaFluor488.
